# Supplementary material for: Kinetic fractionation of noble gases in the stratosphere over Japan
Source: Copernicus journal article supplement (doi:10.5194/acp-26-1537-2026), 2026-01-29
Supplement: Supplementary file 1 [file egusphere-2025-2916_Sugawara_supplement_data.xlsx]

## Sheet: Sheet1
		Supplement Data for the paper "Kinetic fractionation of noble gases in the stratosphere over Japan" by Sugawara et al.
		Table S1. Balloon observation data: June 4, 2007, Sanriku balloon center, Japan
			Altitude	d(29N2/28N2)	d(34O2/32O2)	d(40Ar/28N2)	d(40Ar/36Ar)_by_NIPR	d(40Ar/36Ar)_by_AIST	d(40Ar/38Ar)	d(38Ar/36Ar)	d(86Kr/82Kr)	d(86Kr/83Kr)	d(86Kr/84Kr)	d(132Xe/129Xe)	d(136Xe/129Xe)	d(136Xe/132Xe)	d(84Kr/40Ar)	d(132Xe/40Ar)	d(22Ne/40Ar)	CO2-age	SF6-age
			km	per meg	per meg	per meg	per meg	per meg	per meg	per meg	per meg	per meg	per meg	per meg	per meg	per meg	per meg	per meg	per meg	years	years
			14.5	0	0	0	17.4376	0	-8.26805	25.7421	6.2606	0.0306131	-10.6917				-376.179	-11.9322		0.528323	1.00058
			17	6.05	12.4	54	86.608	45.6		38.8633	35.6395						589.142			1.17119	1.53224
			18.5	-7.05	-21.7	-124.8	-3.49731	-64.4	-1.8552	-1.6682	-1.94269	-4.69594	7.31626				151.739	92.6802		2.55784	3.28576
			21	-18.2	-51	-321.6	-53.0492	-118.4	-23.3318	-29.7501	-37.1187	-24.6127	-10.4952				-421.094	-475.733		4.11053	5.07122
			23	-16.05	-19.5	-134.4	-18.6148	-75.6	-11.7028	-6.9103	-48.6016	-36.8387	-28.2478				-126.153	-52.7502		3.91832	4.64835
			26	-20.2	-40.5	-280.8	-40.4227	-82	-26.7711	-13.639	-12.0176	-1.58663	-2.75063				-689.077	-423.855		3.99277	4.69496
			28.3	-31.15	-60.1	-283.2	-69.3867	-92.4	-25.7073	-43.5596	-115.929	-78.9933	-73.8121				-536.642	-833.626		4.46936	6.18369
			29.9	-28.5	-63.3	-387.6	-102.395	-128	-45.3569	-57.0746	-83.7199	-81.8016	-44.8436				-613.199	-1184.17		4.43903	5.93783
			31.3	-42.65	-89.2	-549.6	-125.419	-206	-71.4299	-53.9001	-93.9672	-68.1793	-51.6078				-1056.46	-1771.67		4.74571	6.58197
			32.8	-44.85	-96.7	-589.2	-116.548	-203.6	-56.3013	-60.1852	-93.8584	-49.8405	-44.388				-1326.52	-1455.97		4.79002	6.73293
		Table S2. Balloon observation data: July 25, 2020, Taiki Aerospace Research Field, Japan
			Altitude	d(29N2/28N2)	d(34O2/32O2)	d(40Ar/28N2)	d(40Ar/36Ar)_by_NIPR	d(40Ar/36Ar)_by_AIST	d(40Ar/38Ar)	d(38Ar/36Ar)	d(86Kr/82Kr)	d(86Kr/83Kr)	d(86Kr/84Kr)	d(132Xe/129Xe)	d(136Xe/129Xe)	d(136Xe/132Xe)	d(84Kr/40Ar)	d(132Xe/40Ar)	d(22Ne/40Ar)	CO2-age	SF6-age
			km	per meg	per meg	per meg	per meg	per meg	per meg	per meg	per meg	per meg	per meg	per meg	per meg	per meg	per meg	per meg	per meg	years	years
			14.79	0	0	0	0.194	0	6.312	-6.071	6.168	-0.669	-13.95	-15.36	-25.87	-10.713	181.238	-1282.91		1.42139	1.2387
			16.86	3.37445	2.73394		3.812	10.0106	-1.068	2.669	-5.501	-5.778	-14.976	0.366	-0.661	-2.049	647.989			3.66426	1.75305
			18.62	-8.95311	-17.8886	-241.139	-18.445	-7.52433	-5.425	-12.954	22.544	2.896	-12.137	-26.377	-38.453	-12.202	-30.633	-617.513	-736.334	2.26168	2.51558
			20.86	-8.85815	-42.234		-65.448	-40.551	-27.375	-37.992	-51.792		-38.529	8.923	21.264	5.98	-644.787			3.63168	4.1993
			22.7	-25.4583	-42.6623	-474.382	-71.882	-70.9671	-37.933	-33.861	-38.952		-39.804	0.047	-91.5	-91.701	-532.166	-1117.63	182.679	4.4198	4.87313
			24.81			-792.678										-94.458		-2227.82	784.65	4.86182	6.36876
			26.86	-39.0855	-71.1731	-641.095	-113.374	-104.84	-55.417	-57.976	-64.753	-50.417	-50.432	-39.829	-114.303	-74.649	-748.084	-1334.19	950.888	5.71837	6.09675
			28.83	-43.6079	-75.1266	-758.229	-131.37	-151.546	-69.391	-61.838	-39.197	-44.132	-40.268	-31.443	-147.285	-116.108	-1054.07	-1982.84	726.502		6.02925
			30.94	-55.5348	-103.593	-707.828	-170.568	-175.063	-82.59	-88.034	-80.354	-75.757	-35.022		-58.77	-75.182					6.063
			33.26	-73.7796	-132.764	-1079.82	-210.7	-214.674	-102.387	-108.374	-93.551	-80.15	-57.867	-40.582	-130.119	-89.82	-1400.44	-2326.67	2164.11	5.66292	6.26643
			35.36	-53.2368	-96.1486	-846.101	-157.688	-157.208	-70.981	-86.687	-92.599	-72.453	-55.505	-55.861	-103.385	-47.807	-1037.03	-2296.52	731.189	5.74495	6.13062
