# Supplementary material for: Kinetic fractionation of noble gases in the stratosphere over Japan
Source: Copernicus journal article supplement (doi:10.5194/acp-26-1537-2026), 2026-01-29
Supplement: Supplementary file [file acp-26-1537-2026-supplement-title-page.pdf › acp-26-1537-2026-supplement-title-page.pdf]

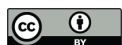

## *Supplement of*

# **Kinetic fractionation of noble gases in the stratosphere over Japan**

**Satoshi Sugawara et al.**

*Correspondence to:* Satoshi Sugawara ([sugawara@staff.miyakyo-u.ac.jp](mailto:sugawara@staff.miyakyo-u.ac.jp))

- [acp-26-1537-2026-supplement-title-page.pdf](#)
- [egusphere-2025-2916\\_Sugawara\\_supplement\\_data.xlsx](#)

The copyright of individual parts of the supplement might differ from the article licence.
